# Supplementary material
Source: publisher site journal article supplement (https://www.dovepress.com/get_supplementary_file.php?f=487698.docx)
Supplement: Supplementary file 1 [file get_supplementary_file.php]

**Table S1. The top ten co-cited journals.**

| **Rank** | **Journal** | **Citations** |
| --- | --- | --- |
| 1 | Journal of Allergy and Clinical Immunology | 14817 |
| 2 | Allergy | 5417 |
| 3 | Clinical and Experimental Allergy | 4333 |
| 4 | Pediatric Allergy and Immunology | 4013 |
| 5 | Journal of Pediatrics | 2780 |
| 6 | Journal of Pediatric Gastroenterology and Nutrition | 2597 |
| 7 | Pediatrics | 2528 |
| 8 | Annals of Allergy, Asthma & Immunology | 1910 |
| 9 | Archives of Disease in Childhood | 1200 |
| 10 | Acta Paediatrica | 1083 |

**Table S2. The top ten co-cited authors.**

| **Rank** | **Journal** | **Citations** |
| --- | --- | --- |
| 1 | Hugh A. Sampson | 1246 |
| 2 | Scott H. Sicherer | 1160 |
| 3 | Arne Host | 1042 |
| 4 | Yvan Vandenplas | 977 |
| 5 | Alessandro Fiocchi | 767 |
| 6 | Anna Nowak-Wegrzyn | 686 |
| 7 | David J. Hill | 578 |
| 8 | Roberto Berni Canani | 536 |
| 9 | Stephen A. Bock | 436 |
| 10 | Julie M. Skripak | 420 |
